# Supplementary material for: Biological Evaluation of 8-Methoxy-2,5-dimethyl-5H-indolo[2,3-b] Quinoline as a Potential Antitumor Agent via PI3K/AKT/mTOR Signaling
Source: MDPI journal article supplement (doi:10.3390/ijms242015142), 2023-10-13
Supplement: s1 [file s1]

## Supporting Materials

### **Biological evaluation of the neocryptolepine derivative MMNC as a potential antitumor agent by PI3K/AKT/mTOR signaling**

Yunhao Ma<sup>1, †</sup>, Xinrong Jiang<sup>1, †</sup>, Zhongkun Zhou<sup>1</sup>, Yong Zhou<sup>1</sup>, Yanan Tian<sup>2</sup>, Hao Zhang<sup>1</sup>, Mengze Sun<sup>1</sup>, Lixue Tu<sup>1</sup>, Juan Lu<sup>1</sup>, Yuqing Niu<sup>1</sup>, Huanxiang Liu<sup>2</sup>, Hongmei Zhu<sup>1, \*</sup>, Yingqian Liu<sup>1, \*</sup>, Peng Chen<sup>1, \*</sup>

<sup>1</sup> School of Pharmacy, Lanzhou University, No. 199 Donggang West Road, Lanzhou, 730000, People's Republic of China

<sup>2</sup> Faculty of Applied Science, Macao Polytechnic University, Macao, China

---

† The authors contributed equally to this work.

\* Correspondence and requests for materials should be addressed to Hongmei Zhu (E-mail: hmzhu@lzu.edu.cn) or Yingqian Liu (E-mail: yqliu@lzu.edu.cn) or Peng Chen (E-mail: chenpeng@lzu.edu.cn). Tel. & fax: +86 931 8915686.

**Table S1** The molecular docking scoring of MMNC and proteins

**Figure S1**  $^1\text{H}$  NMR spectra of MMNC

**Figure S2**  $^{13}\text{C}$  NMR spectra of MMNC

**Figure S3** Mass spectrometry of MMNC

**Figure S4** Purity test of MMNC by HPLC

**Table S1. The molecular docking scoring of MMNC and proteins**

| Target                | PDB ID | Resolution (Å) | Organisms           | Docking score |
|-----------------------|--------|----------------|---------------------|---------------|
| CDK1                  | 4y72   | 2.3            | <i>Homo sapiens</i> | -8.834        |
| MEK                   | 5eym   | 2.7            | <i>Homo sapiens</i> | -7.613        |
| PI3K                  | 6gvf   | 2.5            | <i>Homo sapiens</i> | -7.543        |
| mTOR                  | 4jt6   | 3.6            | <i>Homo sapiens</i> | -7.45         |
| β-catenin             | 3tx7   | 2.76           | <i>Homo sapiens</i> | -7.397        |
| JNK                   | 4y5h   | 2.06           | <i>Homo sapiens</i> | -7.207        |
| P21                   | 5bms   | 2.9            | <i>Homo sapiens</i> | -7.137        |
| Raf                   | 5fd2   | 2.89           | <i>Homo sapiens</i> | -7.057        |
| Cyclin E <sub>1</sub> | 5l2w   | 2.8            | <i>Homo sapiens</i> | -6.963        |
| Cyclin A              | 6gue   | 1.99           | <i>Homo sapiens</i> | -6.793        |
| AKT                   | 6hhf   | 2.9            | <i>Homo sapiens</i> | -6.436        |
| MAPK                  | 6tca   | 3.7            | <i>Homo sapiens</i> | -6.113        |
| JAK                   | 5tq6   | 2.06           | <i>Homo sapiens</i> | -5.91         |
| Caspase-3             | 6x8k   | 2.17           | <i>Homo sapiens</i> | -5.536        |
| E-cadherin            | 3l6y   | 3              | <i>Homo sapiens</i> | -4.314        |
| CDK6                  | 1jow   | 3.1            | <i>Homo sapiens</i> | -4.105        |
| Ras                   | 7jhp   | 2.77           | <i>Homo sapiens</i> | -4.048        |
| Bcl-2                 | 4b4s   | 1.9            | <i>Homo sapiens</i> | -3.987        |

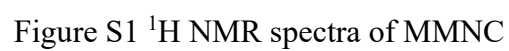Figure S1  $^1\text{H}$  NMR spectra of MMNC

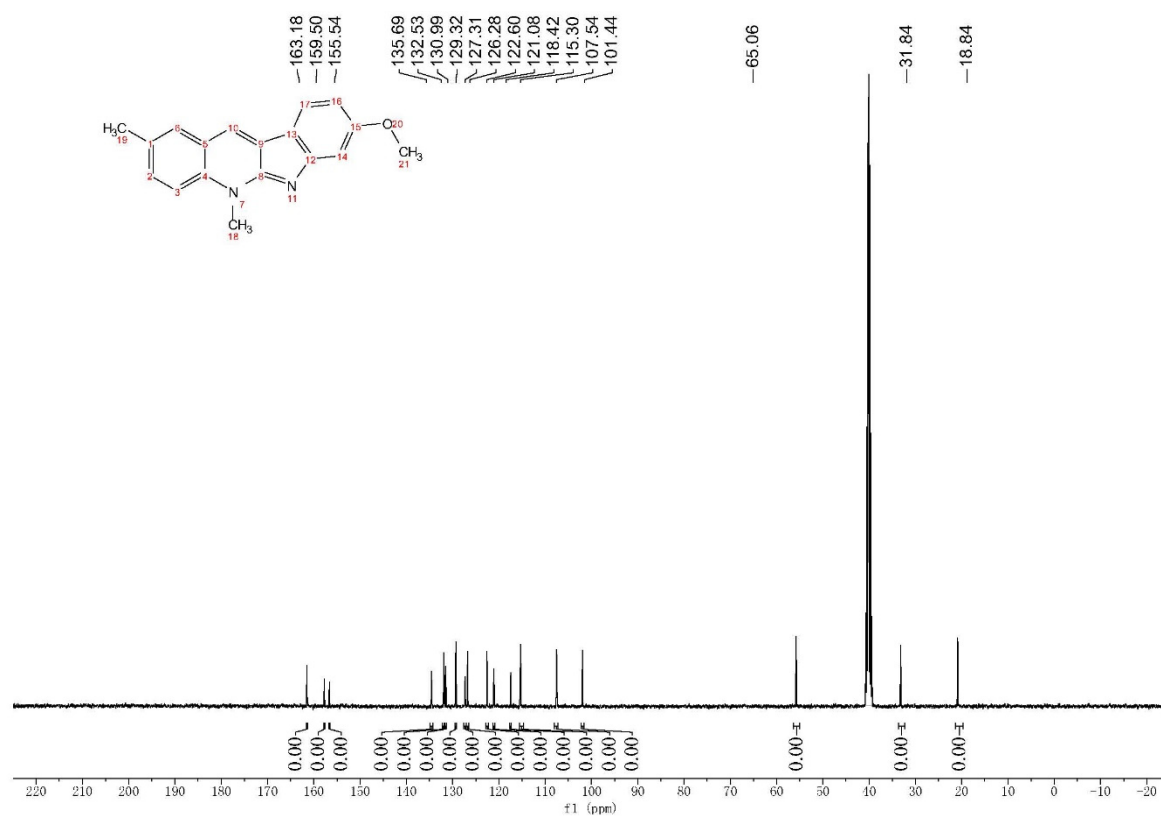

Figure S2  $^{13}\text{C}$  NMR spectra of MMNC

| Sample Name | Position               | Instrument Name                 |
|-------------|------------------------|---------------------------------|
| User Name   | Inj Vol                | InjPosition                     |
| Sample Type | IRM Calibration Status | Data Filename                   |
| ACQ Method  | Success                | 20220905-jiangxinrong-Z44-002.d |
|             | Comment                | Acquired Time                   |

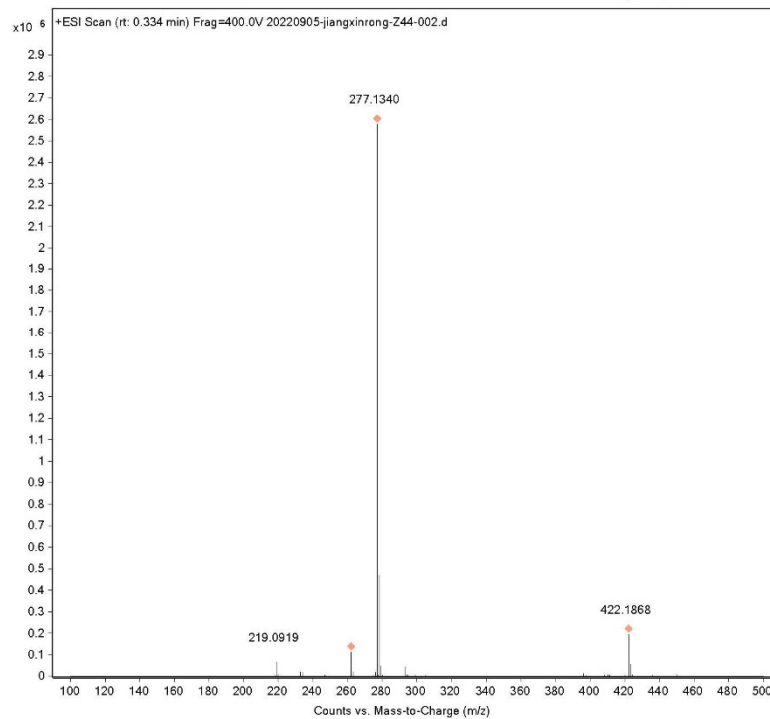

Figure S3 Mass spectrometry of MMNC

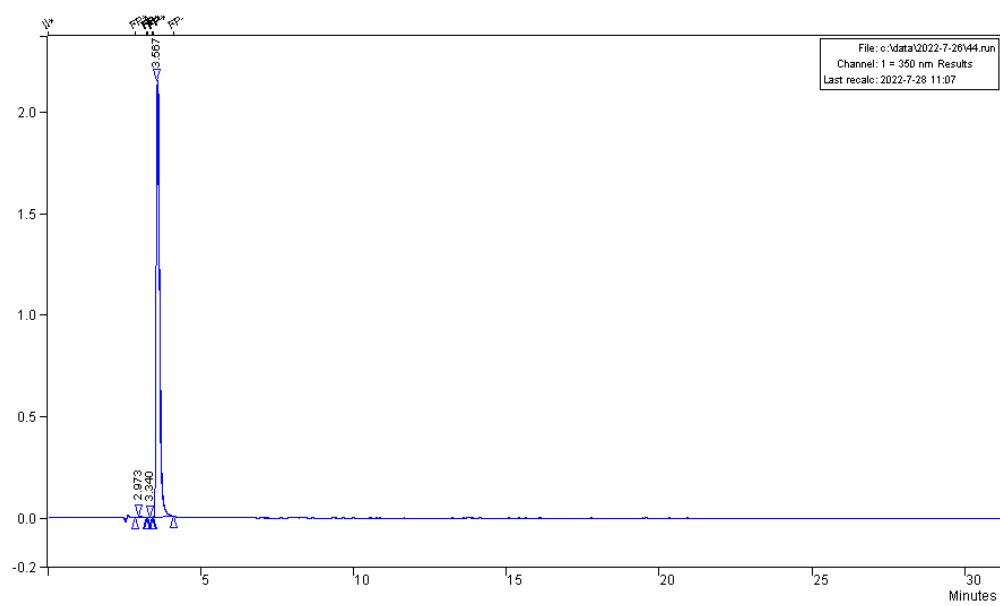

Figure S4 Purity test of MMNC by HPLC
